# Supplementary material for: Predicting dementia in people with Parkinson’s disease
Source: NPJ Parkinsons Dis. 2025 May 13;11:126. doi: 10.1038/s41531-025-00983-4 (PMC12075756; doi:10.1038/s41531-025-00983-4)
Supplement: Supplementary file 3 — Supplementary Table 1 [file 41531_2025_983_MOESM3_ESM.xlsx]

## Sheet: Variables
Variable	UKB Field ID	Description	ICD10 Code	Domain
Sex	31	Sex	-	Demographics
Age	21022	Age at recruitment	-	Demographics
Country of birth	1647	Country of birth (UK/elsewhere)	-	Demographics
Ethnic background	21000	Ethnic background	-	Demographics
Body mass index	21001	Body mass index	-	Demographics
Tea consumption per day (cups)	1488	Tea intake	-	Lifestyle
Coffee consumption per day (cups)	1498	Coffee intake	-	Lifestyle
Water consumption per day (glass)	1528	Water intake	-	Lifestyle
Alcohol consumption (frequency)	1558	Alcohol intake frequency	-	Lifestyle
Smoking status	20116	Smoking status	-	Lifestyle
Daytime sleep	1220	Daytime dozing / sleeping	-	Comorbidity
Breastfed	1677	Breastfed as a baby	-	Demographics
Childhood obesity	1687	Comparative body size at age 10	-	Demographics
Handedness	1707	Handedness (chirality/laterality)	-	Demographics
Maternal smoking around birth	1787	Maternal smoking around birth	-	Environmental
Depression	20002	Non-cancer illness code, self-reported	F32.0, F32.1, F32.2, F32.3, F32.4, F32.5, F32.6, F32.7, F32.8, F32.9	Comorbidity
Anxiety	20002	Non-cancer illness code, self-reported	F41.2, F41.3, F41.8, F41.9	Comorbidity
Diabetes	20002	Non-cancer illness code, self-reported	E10.0, E10.1, E10.2, E10.3, E10.4, E10.5, E10.6, E10.7, E10.8, E10.9, E11.0, E11.1, E11.2, E11.3, E11.4, E11.5, E11.6, E11.7, E11.8, E11.9, E12.0	Comorbidity
Hearing loss	20002	Non-cancer illness code, self-reported	H91.0, H91.1, H91.2, H91.3, H91.8, H91.9	Comorbidity
Visual loss	20002	Non-cancer illness code, self-reported	H54.7	Comorbidity
Hypercholesterolemia	20002	Non-cancer illness code, self-reported	E78.0	Comorbidity
Obesity	20002	Non-cancer illness code, self-reported	E66.0, E66.1, E66.8, E66.9	Comorbidity
Hypertension	20002	Non-cancer illness code, self-reported	I10.0	Comorbidity
Migrane	20002	Non-cancer illness code, self-reported	G43.0, G43.1	Comorbidity
Family depression	20107, 20110 , 20111	Illnesses of father, Illnesses of mother , Illnesses of siblings	-	Family history
Family stroke	20107, 20110 , 20111	Illnesses of father, Illnesses of mother , Illnesses of siblings	-	Family history
Family diabetes	20107, 20110 , 20111	Illnesses of father, Illnesses of mother , Illnesses of siblings	-	Family history
Family dementia	20107, 20110 , 20111	Illnesses of father, Illnesses of mother , Illnesses of siblings	-	Family history
Family parkinson	20107, 20110 , 20111	Illnesses of father, Illnesses of mother , Illnesses of siblings	-	Family history

## Sheet: SNPs
rsid	gene	MAF
rs2230288	GBA	0.0211023
rs9917256		0.142006
rs356219	LOC124900602	0.58863
rs1372519	SNCA/SNCA-AS1	0.805735
rs34311866	TMEM175	0.201961
rs59852608		0.0589623
rs199441	NSF/LRRC37A2	0.816038
rs56328224	LOC105369225	0.185576
rs56214516	LINC02210-CRHR1	0.157026
rs4630591	KANSL1	0.165963
rs28399664	BCAM	0.0213505
rs6859	NECTIN2	0.572989
rs60049679	APOC1P1	0.0754717
rs769449	APOE	0.138158
rs449647	APOE	0.159384
rs157580	TOMM40	0.613952
rs7412	APOE	0.0780785
rs2927438		0.771226
rs138607350	NECTIN2	0.00868918
rs1081105	APOE	0.0301639
rs3925681	APOC1	0.414225
rs111371860		0.0594588
rs2927468	NECTIN2	0.526688
rs4680
rs2306604
rs139650807

## Sheet: Counts
Dataset	No. PwPD	No. PwPDD	Ratio (PwPD/PwPDD)
Ukbiobank	3541	487	0.88/0.12
PPMI	515	122	0.8/0.2

## Sheet: pgs777_maf
rsid2	gene	MAF
rs138073281	TMEM108	0.0188035
rs182987047	RIMS2	0.0134076
rs8050111	WWOX	0.0688262

## Sheet: pgs4281_maf
rsid	gene	MAF
rs4654874	EIF4G3	0.56275
rs9426356	LOC107984933	0.442196
rs4654352	LOC107984933	0.557803
rs766385	LOC107984933	0.723471
rs6692151	FGGY	0.466329
rs2296697	ADGRL2	0.351921
rs7513082	UBQLN4/LOC105371729	0.102054
rs870046	KIAA1614-AS1	0.393949
rs1556763	ZBTB41	0.88803
rs6661843	ATP2B4	0.0131543
rs17187568		0.107066
rs2254494	EPRS1/LOC124904819	0.691565
rs12139390	OR2W3	0.794689
rs206826		0.708858
rs2949076		0.429491
rs11124513	CRIM1	0.283708
rs2714474	CEBPZ/NDUFAF7	0.832617
rs12712846	MTA3	0.34664
rs1879318	NRXN1	0.937044
rs13427078	LOC101927235	0.0446001
rs17032545		0.14914
rs4458215	IL37	0.211552
rs7561528	LOC105373605	0.332017
rs744373		0.293625
rs11899256	CSRNP3	0.252813
rs12469810	STAT4-AS1/LOC107985785/LOC124900514	0.0220646
rs13014947		0.567592
rs6747620	NYAP2	0.138927
rs6735106		0.0472252
rs4663873		0.590628
rs4663331	LINC01937	0.147652
rs10929296		0.869642
rs7632256	SRGAP3	0.394969
rs6805894	KAT2B	0.0369946
rs7629478	RARB	0.249215
rs10510763	LOC105377094	0.181086
rs7613063		0.497112
rs7615669	LOC107986098	0.0526242
rs498805	ROBO1	0.356917
rs4513510	EVC	0.670882
rs1827594	KCNIP4/LOC105374516	0.226471
rs1441669		0.383573
rs2973236	C4orf19	0.245863
rs418757		0.298562
rs1841432		0.158734
rs9991654	NDST4	0.130252
rs4863798	LINC00499	0.706605
rs41482647		0.0528478
rs10016262	IQCM	0.841673
rs11725375		0.240918
rs4632707		0.781926
rs461425		0.0931466
rs7714315		0.178684
rs376855	LINC01019	0.246063
rs16875054	ADAMTS16	0.0382625
rs39968		0.684078
rs10461637		0.639441
rs248528	LOC124901094	0.92703
rs1351119	SYNPO	0.276899
rs17054414		0.127734
rs11742401	ADAM19	0.238536
rs7734791		0.121839
rs10463056	FAF2	0.203613
rs2842367	SSR1	0.651111
rs2876583	CDKAL1	0.95073
rs2495965		0.904075
rs2495976		0.769439
rs4713791		0.844718
rs7739762	BTBD9	0.1777
rs2034782		0.0527093
rs9343011	KCNQ5	0.68729
rs2655654		0.502799
rs2342480	PNLDC1	0.677838
rs2144746	SMOC2	0.335114
rs3814477	MAFK	0.522825
rs10950842	AMZ1	0.447426
rs10274012	SDK1	0.336089
rs725436		0.180299
rs190	JAZF1	0.426094
rs6462322	PDE1C	0.259825
rs740214	SUGCT/LOC105375244	0.120354
rs4543454	PKD1L1	0.418693
rs1880195		0.661981
rs2706851	LOC105375409	0.304807
rs17342647	CYP3A43	0.113783
rs2950520	CASTOR3	0.730831
rs5015756	ZCWPW1	0.553488
rs2905237		0.945796
rs7009980	CSMD1	0.0612422
rs1653024	DLC1	0.828681
rs13255049		0.393435
rs9331896	CLU/MIR6843	0.588772
rs7833909	PXDNL	0.127948
rs3107060	CFAP418-AS1	0.33084
rs2468885		0.483504
rs1355499		0.483799
rs2458064		0.582279
rs11992999	HAS2	0.291693
rs7834818	FBXO32	0.266081
rs12675641		0.371643
rs10815357		0.204432
rs10815358		0.202315
rs324490	PTPRD	0.834202
rs649891	PTPRD	0.192182
rs10966221	LOC124902327	0.17707
rs983471		0.629071
rs3739752	LOC105376161	0.192159
rs674178	TMEM245	0.459501
rs512165	CFAP77	0.449458
rs944812	CFAP77/LOC124902293	0.421205
rs7864386	CFAP77	0.445813
rs10858123	PAEP	0.0620772
rs12569391	USP6NL	0.229275
rs12254394	PLXDC2	0.054564
rs2257108		0.0448299
rs2574976	SGMS1	0.101913
rs11003066	LOC105378305	0.195654
rs16928637	UNC5B	0.0585966
rs12256977	LOC105378379	0.0463194
rs10881815	SH2D4B	0.448458
rs10881816	SH2D4B	0.349812
rs2147419	FAS	0.722595
rs1936611		0.102962
rs11186333	HTR7	0.0704265
rs12251897		0.0944228
rs2736927		0.943168
rs2484234		0.941932
rs11824633	ZNF215/LOC107984019	0.0765897
rs1464896		0.281581
rs1982099	LINC02742	0.714919
rs2081547	MS4A4E	0.401896
rs7940110		0.0577308
rs7947982		0.295879
rs4753439		0.23085
rs1784934	SORL1	0.369354
rs2109553	B4GALNT3	0.4513
rs2277402	ANO2	0.456024
rs11045821	SLCO1B1	0.154365
rs17474391	SOX5	0.0953593
rs368305	LINC02396/LINC02395	0.791185
rs3782473	GALNT6	0.242909
rs7135822	ACSS3	0.476398
rs10774756	LOC105369998	0.303178
rs11060762	ABCB9	0.0836679
rs6488898	ATP6V0A2/LOC105370042	0.92915
rs11835252	DNAH10/LOC105370044	0.65384
rs3867146	CCDC92	0.110476
rs747443	NCOR2	0.682851
rs906303	NCOR2	0.11025
rs11057635	NCOR2	0.528443
rs10492036		0.62156
rs1011043	TMEM132D	0.311845
rs11060239	TMEM132D	0.329096
rs6490725		0.65006
rs4770718	LOC107984610	0.248876
rs2150796	HMGB1	0.374644
rs9548610		0.763161
rs1417850		0.753354
rs1336604		0.478322
rs10492483		0.0546758
rs4901596		0.61078
rs971676	LOC105378178	0.867589
rs9989177	DNAAF2	0.52541
rs17762499	PELI2	0.154754
rs7148536	SYT16	0.411272
rs17100627	KCNH5	0.361881
rs8008282		0.145749
rs12903906		0.421409
rs4924192		0.621607
rs1072347		0.0369946
rs6493994		0.045072
rs782929	RORA/LOC107984805	0.0654348
rs1815130	HERC1	0.867273
rs2577016	NR2F2-AS1	0.257222
rs7179850	LRRK1	0.936749
rs3948441	SNX29/LOC105371085	0.818455
rs1560104		0.317526
rs8050838	XYLT1	0.22544
rs4788426	PRKCB	0.650182
rs151320	SGF29	0.123613
rs233525	LOC105371317	0.329364
rs2097840	MLKL	0.393389
rs7203189		0.232912
rs12600094	USP10	0.0315228
rs12453108	VPS53/LOC124903890	0.179404
rs3930821		0.86142
rs12603672		0.0571512
rs4309	ACE	0.429384
rs1533336		0.80023
rs9896922	PRKCA	0.558981
rs8075800	ARSG	0.119038
rs17739194	ARSG	0.0494933
rs4793364		0.780742
rs9959968		0.0574364
rs7240980		0.356151
rs10502744		0.107753
rs11661933	SLC14A2/LOC101927961	0.0714451
rs9962113	RNF165	0.251581
rs4939832	SMAD7	0.252787
rs525839	NEDD4L	0.349661
rs292457	NEDD4L	0.335834
rs8092366		0.72868
rs1423089	ZNF709	0.468568
rs367280	ZNF257	0.575356
rs11083753	LINC01532	0.496861
rs4422091	TDRD12	0.521481
rs7260482		0.277102
rs714948	PVR	0.110991
rs2927438		0.786496
rs4803759		0.699978
rs8105340	NECTIN2	0.878948
rs3852861	NECTIN2	0.421917
rs7254892	NECTIN2	0.0342567
rs157580	TOMM40	0.608011
rs2075650	TOMM40	0.144037
rs157582	TOMM40	0.21926
rs157590	TOMM40	0.470481
rs1160985	TOMM40	0.43504
rs769450	APOE	0.393909
rs439401		0.636503
rs1064725	APOC1	0.0409697
rs5167	APOC2/APOC4/APOC4-APOC2	0.353601
rs7257610	CLPTM1	0.0451664
rs6014947	BMP7	0.481718
rs10375	BMP7	0.502431
rs192319	ZNF831	0.688535
rs1076822		0.209357
rs462840		0.778104
rs395379	BCL2L13	0.164436
rs759404	PRODH	0.0706614
rs178030	SERPIND1/PI4KA	0.330504
rs165696	PI4KA	0.325513
rs138685	TTC28	0.522857
rs4823000	ZNRF3	0.0220995
rs2839998	SF3A1	0.164717
rs5753137		0.512454
rs5755525		0.0340392
rs8142508		0.543527
rs138840	BRD1	0.104387
rs138845	BRD1	0.156359
rs138887		0.123109
rs5769750		0.899819
